# Supplementary material for: Effect of bosentan in pulmonary hypertension development in systemic sclerosis patients with digital ulcers
Source: PLoS One. 2020 Dec 10;15(12):e0243651. doi: 10.1371/journal.pone.0243651 (PMC7728198; doi:10.1371/journal.pone.0243651)
Supplement: S1 File — (XLSX) [file pone.0243651.s001.xlsx]

## Sheet: Sheet1
EncryptedID	ORIGIN	SEX	BORN	DIAGNOSTIC	TIME WITH DISEASE	DU	DU EPISODES	BOSENTAN	start bosentan	END BOSENTAN	ADVERSE EFFECT BOS	STOP BOS BY AE	PROSTANOIDS	PDE-5 INH	START PDE-5INH	END PDE5 INH	CCB USE	START CCB	STOP CCB	WHY STOP CCB	ASPIRIN	STAR ASPIRIN	STOP ASPIRIN	WHY STOP ASPIRIN	ARAII/ ACE	START	STOP	WHY STOP	STATINS	START	STOP	WHY STOP	MTX	CYC	MMF/MS	AZA	CORTICOIDS	LF	SSZ	RTX	TELANGIECTASIA	CALCINOSIS	mRSS FIRST	mRSS LAST	ILD	DATE	PH BY ECHO	EF FIRST	PAPs FIRST
11806656	2	male	1950	1987	26	yes	5	yes	2005				yes	yes	2005	2005	yes	2001			yes	1994			yes	2004			no				no	no	yes	no	no	no	no	no	yes	yes		23	no		yes	65	45
423571	2	female	1951	1991	22	yes		no					yes	yes	2006	2006	yes	1991			yes	2004			no				no				no	no	no	no	no	no	no	no	yes	no			yes	2006	yes	67	34
12275506	2	female	1979	2007	6	yes		yes	2008	2008			no	yes	2008	2008	yes	2008	2008		no				no				no				no	no	no	no	yes	no	no	no	no	no			yes	2008	yes
4492459	2	female	1950	2003	10	yes		yes	2007	2008	2		yes	yes	2008	2008	no				no				yes	2008			no				no	no	no	no	no	no	no	no	yes	no			yes	2007	yes	65	46
11529669	2	female	1939	1989	24	yes		no					yes	yes	2009	2009	yes	1991			no				no				no				no	yes	no	no	yes	no	no	no	yes	yes			yes	1997	yes	63	31
13832320	2	female	1947	2000	13	yes		yes	2010	2010	4	yes	no	yes	2010	2011	yes	2010	2011		yes	2010	2011		yes	2010	2011		no				no	no	yes	yes	yes	no	no	no	yes	no			yes	2005	yes	64	55
885505	1	female	1965	1988	25	yes	8	yes	2004		1	no	no	yes	2010	2011	yes	1995	2008	1	yes	1999			no				yes	2009			yes	no	no	yes	yes	no	yes	no	yes	yes	9		no		no	64
5082514	2	female	1950	1988	25	yes		yes	2005	2005			yes	yes	2005		yes	2003			no				yes	2003	2005		no				no	yes	no	no	yes	no	no	no	yes	yes			yes	2004	yes	56
10700545	2	female	1964	2002	11	yes		yes	2004	2006	2	yes	no	yes	2006		yes	2002			yes	2002			no				no				no	no	no	no	no	no	no	no	no	yes			yes	2002	yes	65	43
500893	2	female	1960	1984	29	yes		yes	2004	2004	6	yes	no	yes	2007		yes	1984	1987		yes	1988	1992		no				no				no	no	no	no	yes	no	no	no	yes	yes			no		no	56	20
12291222	2	female	1963	1992	21	yes	10	yes	2003				no	yes	2007		yes	1992			yes	1995			yes	2001			no				no	no	no	yes	yes	no	no	no	yes	no			yes	2005	no
499602	2	female	1957	1984	29	yes		yes	2003				yes	yes	2007		yes	1984			yes	2001			yes	2003			no				no	no	no	no	yes	no	no	no	yes	yes			yes	2004	no	71	30
12124741	2	female	1928	2000	13	yes		yes	2007	2008	6	yes	no	yes	2008		yes	2000			yes	2000			no				no				no	yes	yes	no	yes	no	no	no	no	no			yes	2007	yes	77	40
552200	2	female	1975	2005	8	yes	1	yes	2008	2008	2	yes	no	yes	2008		yes	2005			yes	2005			yes	2007			no				no	no	no	no	no	no	no	no	yes	no	0	0	no		no	56	24
191634	2	female	1929	1988	25	yes		yes	2008				no	yes	2008		yes	1990			yes	2008			yes	2008			no				no	no	no	no	no	no	no	no	no	no			no		yes	60
12614857	2	female	1966	2006	7	yes		yes	2007	2011		no	yes	yes	2008		yes	2006	2007	1	yes	2006	2001		no				yes	2006	2007	1	no	yes	yes	yes	yes	no	no	no	yes	yes	18		yes	2008	no	46	38
11477529	2	male	1934	1996	17	yes		yes	2007	2009	2		yes	yes	2008		yes	1996			yes	1999			no				no				no	no	no	no	yes	no	no	no	yes	no	12		yes	2008	yes	66	44
12657271	2	female	1967	2008	5	yes	6	yes	2008				yes	yes	2009		yes	2008			yes	2008			no				no				no	no	yes	no	no	no	no	no	no	no			yes	2010	no	53	35
11344519	2	female	1936	2005	8	yes	1	yes	2007				no	yes	2009		yes	2002			yes	2002			no				yes	2009			no	no	no	no	no	no	no	no	no	no			no
12083678	2	female	1957	1998	15	yes		yes	2008				no	yes	2009		yes	1999			yes	2003			no				no				no	yes	yes	yes	yes	no	no	yes	yes	no			yes	2006	yes	58	50
10554573	2	female	1951	2007	6	yes	3	yes	2008				no	yes	2009		yes	2007			yes	2007			yes	2008			no				no	no	yes	yes	yes	no	no	no	yes	no			no		no	68
23042	2	female	1936	1989	24	yes	1	no					yes	yes	2009		yes	1989	2009		yes	1989	2009		yes	2012	2013		no				no	no	yes	no	no	no	no	no	yes	no			yes	1996	yes	65	48
11726630	2	female	1935	1990	23	yes		no					no	yes	2009		no				yes	2009			no				no				no	no	no	no	no	no	no	no	no	no			yes	2009	yes	58	38
11975286	2	female	1976	2004	9	yes	4	yes	2005				no	yes	2010		yes	2004			yes	2004			yes	2004	2005		no				no	yes	yes	yes	yes	no	no	yes	no	no	14	12	yes	2004	no	53	33
12635379	2	male	1970	2007	6	yes	5	yes	2009				no	yes	2010		yes	2007			no				yes	2010			no				no	yes	yes	no	yes	no	no	no	no	no			yes	2007	no	50
11885451	2	female	1974	2003	10	yes	2	yes	2005	2010	6	no	no	yes	2010		yes	2003	2010	3	yes	2003	2010	4	yes	2005	2010	3	no				no	no	yes	no	yes	no	no	no	yes	no			no		no	67
11949544	2	female	1938	2004	9	yes	3	yes	2010	2010	4	yes	no	yes	2010		yes	2004			no				yes				yes	2010			no	no	no	no	no	no	no	no	yes	no			no		yes	60	46
11651679	2	female	1972	2009	4	yes	2	yes	2009				no	yes	2010		yes	2009			yes	2009			no				no				no	no	no	no	no	no	no	no	yes	no	0	0	no		no	67	26
950594	1	female	1959	1998	15	yes	7	yes	2007		1	yes	yes	yes	2010		yes	2002			yes	2009			no				yes	2010			no	yes	no	no	yes	no	no	yes	yes	yes	7	14	yes	2008	no	82
1459487	1	female	1949	2009	4	yes	1	yes	2005	2005	2	yes	no	yes	2010		yes	2009	2009	1	yes	2009			no				no				no	no	no	no	no	no	no	no	no	no			no		no	79
1095801	1	female	1969	2001	12	yes	3	yes	2010	2010	2	yes	no	yes	2010		yes	2002	2002	1	no				yes	2002			yes	2010	2012	1	no	no	no	no	no	no	no	no	yes	yes	10	11	yes	2002	no
10326498	2	female	1968	2010	3	yes	1	no					no	yes	2010		no				yes	2010			no				no				no	no	no	no	no	no	no	no	no	no			yes	2010	no	60
13836270	2	female	1970	2010	3	yes	2	yes	2010	2010			yes	yes	2011		yes	2010	2010	1	yes	2010			no				yes	2011			no	no	yes	no	yes	no	no	no	yes	no			yes	2010	no	72	43
11893500	2	female	1945	2005	8	yes		no					no	yes	2011		yes	2008	2008	1	no				no				no				no	no	no	yes	no	no	no	no	yes	yes	0	0	no		yes	73	59
456793	2	female	1935	2003	10	yes	2	no					no	yes	2011		yes	2003	2011	3	no				yes	2001			no				no	no	no	no	no	no	no	no	yes	no			yes	2004	yes	72	85
12120894	2	female	1943	1998	15	yes	3	yes	2010				yes	yes	2012		yes	2000			yes	2000			yes	1998			no				no	yes	yes	yes	yes	no	no	no	yes	no	6		yes	1998	yes	66	45
616960	1	female	1961	1977	36	yes	5	yes	2011		2		yes	yes	2012		yes	1994			yes	2011			no				yes	1994			no	no	no	no	no	no	no	no	yes	no			yes	2005	yes
11285166	2	female	1973	1989	24	yes	3	yes	2004				no	yes	2012		yes	1992			yes	1989			yes	2003			no				no	yes	yes	no	yes	no	no	no	yes	yes	11		yes	2006	no
1313236	1	female	1946	2007	6	yes	5	yes	2009	2012	2	yes	no	yes	2012		yes	2008			yes	2008			no				no				no	no	no	no	yes	no	no	no	no	yes	8		yes	2009	no
1176246	2	female	1936	1988	25	yes		yes	2007				no	yes			yes	1996			no				no				no				no	no	no	no	yes	no	no	no	yes	no			yes	1996	yes		20
472317	2	female	1956	2000	13	yes		yes	2005				no	no			yes	2000	2012	3	yes	2002	2012	4	no				no				no	no	no	no	no	no	no	no	yes	no			no		yes	73	32
12191069	2	female	1934	2001	12	yes		yes	2003	2003	1	no	no	no			yes	2001			yes	2001	2003		no				no				no	yes	no	no	yes	no	no	no	yes	no			yes	2003	yes	76	45
19958198	2	female	1943	1989	24	yes	5	yes	2003	2004	1	no	yes	no			yes	1990			yes	1991			yes	2003			no				no	yes	no	yes	yes	no	no	no	yes	no	6		yes	1991	yes		59
5028353	2	female	1962	2002	11	yes		yes	2003	2004			yes	no			yes	2002	2003	1	yes	2003	2004	4	yes	2004	2004		no				no	no	no	yes	yes	no	no	no	yes	no			yes	2003	yes	68	75
5091913	2	female	1940	1992	21	yes		yes	2004	2006		no	yes	no			yes	1993	2004	1	no				no				no				no	no	no	no	no	no	no	no	yes	yes			yes	2004	yes	63
12587807	2	female	1937	1984	29	yes		yes	2004	2004			no	no			yes	2004	2005	1	yes	1997			yes	2006			yes				no	no	no	no	no	no	no	no	yes	yes			yes	1996	yes	77
11576311	2	female	1940	1981	32	yes		yes	2002	2005			no	no			yes	1984			no				no				no				no	no	no	no	no	no	no	no	yes	no			yes	2002	yes
11252469	2	female	1931	1989	24	yes	1	yes	2003	2010	2	yes	yes	no			yes	1989	2010	1	yes	1989	2010		yes	2003	2010	1	no				no	no	no	no	no	no	no	no	no	yes			no		yes	75
870525	1	male	1926	2006	7	yes	1	yes	2010	2010	2	yes	no	no			yes	2010			yes	2012			yes	2007	2010	2	yes	2006			no	no	no	no	no	no	no	no	no	no	20	11	no		yes
12397001	2	female	1963	2008	5	yes	1	yes	2008				no	no			yes	2009			no				no				no				no	no	yes	no	yes	no	no	no	no	no			no		no	59	26
12459601	2	female	1976	2006	7	yes		yes	2007				no	no			yes	2006			yes	2007			no				no				no	no	yes	no	yes	no	no	no	yes	yes	23		no		no		26
247654	2	female	1950	2005	8	yes		yes	2010				no	no			yes	2010			no				no				no				no	no	no	no	no	no	no	no	yes	no			yes	2009	no		26
12489420	2	female	1984	2003	10	yes	8	yes	2004	2005	2	yes	no	no			yes	2003			yes	2003			no				no				no	yes	yes	no	yes	no	no	no	yes	no			yes	2005	no	70	26
12422040	2	female	1977	1993	20	yes		yes	2009				no	no			yes	2009			yes	2009			no				no				no	no	yes	no	yes	no	no	no	yes	no	14		yes	2008	no	77	26
11747267	2	female	1970	2003	10	yes		yes	2003				no	no			yes	2003	2004	1	yes	2003			no				no				no	no	no	no	yes	no	no	no	no	no	13	13	yes	2006	no	64	31
12341049	2	female	1984	2003	10	yes		yes	2005	2009	1	no	no	no			yes	2003	2009	3	yes	2005	2009		no				no				no	no	no	no	no	no	no	no	yes	no	22		yes	2003	no	58	31
412106	2	female	1957	2007	6	yes	1	yes	2010	2011	1	no	no	no			yes	2009			yes	2010			no				no				no	no	no	no	no	no	no	no	yes	yes			no		no	70	32
12540130	2	female	1940	2005	8	yes	2	yes	2007	2008	4	yes	no	no			yes	2006	2007		yes	2006			yes	2009			no				no	no	no	no	no	no	no	no	no	no	0	0	no		no	61	33
11933237	2	female	1956	2002	11	yes		yes	2003				no	no			yes	2003			yes	2003			no				no				no	yes	no	no	yes	no	no	no	yes	yes	32		yes	2002	no	55	37
540463	2	female	1971	2009	4	yes	2	yes	2010				no	no			no				no				no				no				no	no	no	no	no	no	no	no	no	no			no		no	73	38
10654215	2	female	1960	2011	2	yes	1	yes	2011	2012			no	no			yes	2000			no				yes	2000			no				no	no	no	no	no	no	no	no	yes	no			no		no	69	40
10132913	2	female	1978	2009	4	yes		yes	2009	2010	1	no	yes	no			yes	2009			yes	2009			yes	2009			no				no	no	no	no	no	no	no	no	yes	no	0	0	no		no	67
12001526	2	female	1943	2010	3	yes	1	yes	2010	2011	6	yes	no	no			yes	2010			yes	2007			yes	2010		36	yes	2009			no	yes	yes	no	yes	no	no	no	yes	no	38		no		no	55
10789467	2	female	1968	2009	4	yes	2	yes	2009				no	no			yes	2009			yes	2009			no				no				no	no	no	no	no	no	no	no	no	no	0		no		no
12622328	2	female	1952	2005	8	yes		yes	2009	2013	6	no	no	no			yes	2005			no				yes	2005			no				no	no	no	no	no	no	no	no	yes	no			no		no	62
12603825	2	male	1957	2005	8	yes	1	yes	2007				no	no			yes	2006	2007		yes	2006			no				no				no	no	no	no	yes	no	no	no	no	no			no		no	55
12660746	2	female	1966	2006	7	yes	1	yes	2008				no	no			yes	2008			no				no				no				no	no	no	no	no	no	no	no	no	no			no		no	74
12442051	2	female	1959	2002	11	yes		yes	2008			no	no	no			yes			1	yes	2005			no				no				no	no	no	no	no	no	no	no	no	no			no		no	58
10839270	2	female	1978	2006	7	yes	2	yes	2009				no	no			yes	2004			no				no				no				no	no	no	no	no	no	no	no	no	no			no		no	66
11606045	2	female	1949	1996	17	yes	7	yes	2003	2005	2	yes	no	no			yes	2002			yes	2002			yes	2002			no				no	no	no	yes	yes	no	no	no	yes	yes			yes	2001	no
11338125	2	female	1946	1983	30	yes	4	yes	2003				no	no			yes	1991			yes	1983			yes	2002	2003	1	no				no	no	no	no	yes	no	no	no	yes	yes			yes	2007	no
1318435	1	female	1979	2008	5	yes	2	yes	2012				no	no			yes	2010			no				no				no				no	yes	yes	yes	yes	no	no	no	no	no	6		yes	2011	no	61.9
1355265	1	female	1955	2008	5	yes	1	yes	2009	2010	1	no	no	no			yes	2008			yes	2010			yes	2008			no				no	yes	yes	no	yes	no	no	yes	yes	yes	21	27	yes	2009	no	64
1427290	1	female	1946	2002	11	yes		yes			2	yes	yes	yes			yes	2002			yes	2002			yes	2010			no				no	no	no	no	no	no	no	no	yes	yes			no		no
998863	1	female	1963	2005	8	yes	2	yes	2011		1	no	no	no			yes	2005			yes	2005			no				yes			1	no	no	no	no	no	no	no	no	no	no	16	16	yes	2010	no
398881	1	female	1942	1999	14	yes	2	yes	2012	2012	2	yes	yes	no			yes	2002	2010	1	yes	2010			yes	2010			yes	2010	2012	1	no	no	no	no	no	no	no	no	yes	yes	10	8	no		no
950016	1	female	1940	1996	17	yes	4	yes	2009	2010	2	yes	no	no			yes	1996			yes	2009			yes	1996			yes	2012			no	no	no	no	no	no	no	no	yes	yes			no		no
5472	1	female	1976	1994	19	yes	10	yes	2009	2010	2	no	no	no											no				no				no	yes	no	no	yes	no	no	no	no	no	45	45	yes	2009	no
1445483	1	female	1964	1995	18	yes	2	yes	2011	2011	2	no	no	no			yes	2010	2010	1	yes	2011			no				yes	2010			yes	no	no	no	no	no	no	no	no	yes	15	16	no		no	80
638217	1	female	1954	2000	13	yes	7	yes	2009		1	no	yes	no			yes	1997			yes	1997			no				no				no	yes	no	yes	yes	no	yes	no	yes	yes	15		yes	1998	no
390118	1	female	1940	1994	19	yes	4	yes	2010	2010	2	yes	no	no			yes	1990			no				yes				yes				no	no	no	no	no	no	no	no	yes	yes			no		no
11878578	2	female	1922	1991	22	yes		no					no	no			yes	2001			yes	2001			yes	1996			no				no	no	no	yes	no	no	no	no	yes	no			yes	1996	yes	71	26
1031942	2	male	1934	1998	15	yes	2	no					no	no			yes	2005			no				no				no				no	no	no	no	no	no	no	no	yes	yes			yes	2006	yes	65	28
11669635	2	female	1936	1995	18	yes		no					no	no			yes	1994	2004	1	yes	1995			no				no				no	no	no	no	yes	no	no	no	yes	no			no		yes	73	31
751698	2	female	1949	2004	9	yes		no					no	no			yes	2004			yes	2004			no				yes	2010			no	no	no	no	no	no	no	no	yes	yes			no		yes	73	32
11794578	2	female	1948	2004	9	yes		no					no	no			yes	2010			no				yes	2002			no				no	no	no	no	no	no	no	no	yes	yes			no		yes	50	35
11933820	2	female	1927	1982	31	yes		no					no	no			yes	2001			yes	1982			no				no				no	no	no	no	yes	no	no	no	no	no			no		yes	74	37
95922	2	female	1941	1992	21	yes		no					no	no			yes	1993			yes	1993			no				no				no	no	no	no	no	no	no	no	yes	yes			yes	2003	yes		38
11432635	2	female	1955	1978	35	yes		no					no				yes	1998			yes	1998			no				no				no	yes	no	yes	yes	no	no	no	yes	no			yes	1998	yes	76	40
191983	1	female	1928	2004	9	yes	2	no					yes	no			yes	2004			yes	2010			no				yes	2010			no	no	no	no	yes	no	no	no	yes	yes		13	yes	2008	yes	65	40
1009470	2	female	1932	1993	20	yes	1	no																																	yes	no			no		yes	60	44
11776528	2	female	1925	2007	6	yes		no					no	no			no				yes	2009			yes	2002			no				no	no	no	no	no	no	no	no	yes	no			yes	2007	yes	69	48
1094086	2	female	1941	1996	17	yes		no					no	no			yes	1996	2006		yes	1996	2006		yes	2003	2006		no				no	yes	no	no	yes	no	no	no	yes	no			yes	2005	yes	70	48
11643109	2	female	1942	1996	17	yes		no					yes	no			yes	1997	1998		yes	1997	1998		yes	1997	1998		no				no	no	no	no	yes	no	no	no	yes	no			yes	1996	yes	77	53
388655	2	female	1916	1993	20	yes		no					no	no			yes	1994			yes	1994			yes	1994			no				no	no	no	no	no	no	no	no	yes	no			yes	2000	yes	81	54
744178	2	female	1928	1981	32	yes		no					no	no			yes	1989	1990		yes	1989	1990		no				no				no	no	no	no	no	no	no	no	no	no			yes	1989	yes		70
543896	2	female	1920	1986	27	yes		no					no	no			yes	1986			no				no				no				no	no	no	no	yes	no	no	no	yes	no			yes	1993	yes	70	74
677445	2	female	1920	1988	25	yes		no					no	no			yes	1990	1991		no				no				no				no	no	no	no	no	no	no	no	yes	yes			yes	1990	yes	52	90
692999	2	female	1921	1988	25	yes		no					no	no			yes	1990	1992		no				no				no				no	no	no	no	no	no	no	no	yes	yes			yes	1994	yes		100
14301560	2	female	1951	1985	28	yes		no									no				yes	2005			no				no				no	no	no	no	no	no	no	no	yes	yes			no		yes	30
893733	2	female	1951	1991	22	yes		no					no	no			yes	1998	2000		yes	1995	2000		no				no				no	yes	no	no	yes	no	no	no	yes	no	8	8	yes	1994	yes
799324	2	female	1941	1991	22	yes		no					no	no			yes	1991	1999		yes	1999			no				no				no	no	no	yes	yes	no	no	no	yes	no			yes	1991	yes	65
760873	2	female	1949	1990	23	yes		no					yes	no			yes	1990	2000		yes	1990	2000		no				no				no	no	no	no	no	no	no	no	yes	no			yes	2000	yes	61
971338	2	female	1929	1993	20	yes		no					no	no			no				no				yes	1998			no				no	no	no	no	no	no	no	no	yes	yes			yes	1997	yes	67
963295	2	female	1917	1993	20	yes		no					no	no			no				no				no				no				no	no	no	no	no	no	no	no	yes	no			no		yes
1014159	1	female	1928	2009	4	yes	2	no					no	no			no				yes	2009			yes	2009			yes	2009			yes	no	yes	no	yes	no	no	no	yes	no			yes	2009	yes
257603	1	female	1927	2000	13	yes	1	no					no	no			yes	2000			no				yes	2000			yes	2000			no	no	no	no	no	no	no	no	yes	no			no		yes	57
233727	1	female	1945	1996	17	yes	1	no					no	no			yes	1996			no				no				no				no	no	no	no	no	no	no	no	yes	no	11		no		yes
76734	1	female	1929	1993	20	yes	2	no					no	no			yes	1993			no				yes	1993			no				yes	no	no	no	no	no	no	no	yes	yes			yes	2008	yes
303209	1	female	1935	2006	7	yes		no					no	yes																											yes				no		yes
375409	1	female	1948	1974	39	yes		no					no	no																															no		yes
138716	1	male	1963	2012	1	yes	4	no					yes	no			yes	2011			yes	2011			no				yes	2012			no	no	no	no	no	no	no	no	no	no	10		no		no	65	12
534705	2	female	1969	1997	16	yes		no					no	no			yes	1999			yes	1999			no				no				no	no	no	no	no	no	no	no	no	no			no		no	69	20
11837573	2	female	1961	2003	10	yes		no					no	no			yes	2004	2004	1	yes	2003							no				no	no	no	no	no	no	no	no	no	no	0	0	no		no	67	21
182978	1	female	1938	1998	15	yes		no					no	no			yes	1997			yes	2006			no				yes	2006			yes	no	no	yes	yes	no	yes	no	no	no	6	6	yes	2004	no	51	23
11757551	2	female	1959	1997	16	yes	1	no					no	no			yes	1998			yes	1998			no				no				no	no	no	no	no	no	no	no	yes	no			no		no	60	24
12345877	2	female	1964	2000	13	yes		no					no	no			no				yes	2009			no				no				no	no	no	no	no	no	no	no	yes	no			no		no	51	24
12002949	2	female	1942	1999	14	yes		no					no	no			yes	1999			yes	1999			no				no				no	no	no	no	yes	no	no	no	yes	yes			no		no	64	26
14813932	2	female	1958	2003	10	yes		no					no	no			yes	2004			no				no				no				no	no	no	no	yes	no	no	no	no	no			no		no	61	28
12231265	2	female	1922	2002	11	yes		no					no	no			yes	2001			yes	2002	2005		yes	2002			no				no	no	no	no	no	no	no	no	yes	no			yes	2002	no	75	28
10303040	2	female	1945	1999	14	yes		no					no	no			yes	1999			yes	2001			yes	2003			yes	2010			no	no	no	no	no	no	no	no	yes	no	14	9	yes	2002	no	59	28
12070119	2	female	1945	1999	14	yes		no					no	no			no				no				no				no				no	yes	no	no	yes	no	no	no	no	no			yes	1999	no	70	28
11646993	2	female	1947	1977	36	yes		no					no	no			yes	1984			yes	1989			yes	1991			no				no	no	no	no	yes	no	no	no	yes	yes			yes	1984	no	57	28
12069192	2	female	1960	1999	14	yes	1	no					no	no			yes	1999			yes	2008			yes	2009			no				no	no	no	no	no	no	no	no	no	no			no		no	75	29
11794967	2	female	1981	2002	11	yes		no					no	no			yes	2002			yes	2002			no				no				no	yes	no	yes	yes	no	no	no	no	no	20	8	yes	2005	no	51	29
10656442	2	female	1961	1997	16	yes		no					yes	no			yes	1999			no				no				no				no	no	no	no	no	no	no	no	no	yes			no		no	70	29
10694463	2	female	1927	1996	17	yes		no					no	no			yes	1996			yes	2004			yes	1996			no				no	no	no	no	no	no	no	no	yes	no			no		no	60	29
11514594	2	male	1965	2001	12	yes		no					no	no			yes	2001			yes	2001			yes	2004			no				no	yes	yes	yes	yes	no	no	no	yes	no	6		yes	2002	no	65	30
12133325	2	female	1956	1999	14	yes		no					no	no			yes	2002	2002		no				no				no				no	no	no	no	yes	no	no	no	yes	no	22		no		no	69	30
12401543	2	female	1970	2001	12	yes		no					no	no			no				yes	2007			no				no				no	no	no	no	no	no	no	no	yes	yes			no		no		30
1220969	2	female	1965	1987	26	yes		no					no	no			yes	2002			yes	1987			no				no				no	no	no	no	no	no	no	no	yes	yes			yes	1997	no	52	30
11838743	2	female	1946	1997	16	yes	1	no					no	no			yes	1998			yes	1998			no				no				no	no	no	no	yes	no	no	no	yes	yes			yes	2002	no	51	30
12145669	2	male	1969	1999	14	yes		no					no	no			yes	1999			yes	2000			yes	1999			no				no	no	no	no	yes	no	no	no	yes	no	12	15	yes	2002	no		31
11663261	2	female	1937	1996	17	yes		no					no	no			yes	1996	1998		yes	1996			yes	1998			no				no	no	no	no	yes	no	no	no	yes	no			no		no	69	31
11308546	2	female	1932	1991	22	yes		no					no	no			yes	1991			yes	1997			no				no				no	no	no	no	no	no	no	no	yes	yes			no		no	59	31
5143139	2	female	1996	2004	9	yes		no					yes	no			yes	2005			yes	2005			yes	2008			no				no	no	no	no	no	no	no	no	yes	no			no		no	60	33
14871	2	female	1943	2008	5	yes		no					no	no			yes	2004			no				no				yes	2008			no	no	no	no	yes	no	no	no	yes	yes			no		no	60	34
12195049	2	male	1949	1991	22	yes		no					no	no			yes	1991			yes	1991			no				yes	2010			no	no	no	yes	yes	no	no	no	yes	no	19	11	yes	2005	no	57	35
11648577	2	female	1960	1991	22	yes		no					no	no			yes	2000	2004	1	yes	2000			yes	2004			no				no	yes	yes	yes	yes	no	yes	yes	yes	no			yes	1999	no	62	35
12300022	2	female	1951	1992	21	yes		no					no	no			yes	1992			no				no				no				no	yes	yes	yes	yes	no	no	no	yes	no			yes	1996	no	67	35
11299651	2	female	1947	1976	37	yes		no					no	no			yes	1985			no				yes	1992			no				no	no	no	no	no	no	no	no	yes	no			no		no	67	35
11930271	2	female	1948	2003	10	yes	1	no					no	no			yes	2009			yes	2009			no				no				no	no	no	no	no	no	no	no	yes	yes			yes	2005	no	76	37
12583865	2	male	1946	1994	19	yes		no					yes	no			yes	2007			yes	1995			yes	2005			no				no	no	no	no	no	no	no	no	yes	yes			yes	2006	no	65	37
638072	2	female	1946	1991	22	yes		no					no	no			no				no								no				no	no	no	no	no	no	no	no	yes	no			no		no	65	37
11612844	2	female	1933	1999	14	yes		no					no	no			yes	2003			yes	2000			yes	1995			no				no	no	no	no	no	no	no	no	yes	no			yes	2000	no	67	37
10425546	2	female	1969	2003	10	yes	1	no					no	no			yes	2011			yes	2010			yes	2011			no				no	no	no	no	no	no	no	no	no	no			no		no	73	38
11796926	2	female	1946	1996	17	yes		no					no	no			yes	1996			yes	1996			yes	1996	2005	1	no				no	no	no	no	no	no	no	no	yes	yes			no		no		38
11360591	2	female	1941	1999	14	yes		no					no	no			yes	1999			yes	1999			yes	2010							no	no	no	no	no	no	no	no	yes	no			no		no	66	38
10116998	2	female	1954	2000	13	yes		no					no	no			yes	2006			no				no				no				no	yes	yes	no	yes	no	no	no	no	no	25	19	yes	2006	no	68	39
77621	2	female	1949	1998	15	yes		no					no	no			yes	1998			yes	2000			yes	2002			yes	2002			no	no	no	no	no	no	no	no	yes	no			no		no	57	39
10868076	2	female	1934	1984	29	yes		no					no	no			yes	1989	2004		no				no				no				no	no	no	yes	yes	no	no	no	yes	yes			yes	2005	no	61	40
139719	2	female	1909	1955	58	yes		no					no	no			no				no				no				no				no	no	no	no	no	no	no	no	yes	yes			no		no		40
1147927	2	female	1932	2004	9	yes		no					no	no			yes	2004	2004	1	yes	2004			yes	2005			no				no	no	no	no	yes	no	no	no	yes	yes			no		no	54	45
5255014	2	female	1935	2006	7	yes		no					no	no			yes	2006			yes	2006			yes	2006			no				no	no	no	no	yes	no	no	no	no	yes			yes	2006	no	72
12457481	2	female	1991	2009	4	yes		no					no	no			yes	2009			no				no				no				no	no	no	no	no	no	no	no	no	no	0	0	no		no
12556845	2	female	1948	2006	7	yes		no					no	no			yes	2006			yes	2006			no				yes	2010			no	no	yes	yes	yes	no	no	no	yes	no	16		yes	2006	no	65
5137276	2	female	1967	2004	9	yes		no					no	no			yes	2004			yes	2005			no				no				no	no	no	no	no	no	no	no	no	no			no		no	65
5101656	2	male	1937	2004	9	yes		no					no	no			yes	2004			yes	2004			no				no				no	no	no	no	no	no	no	no	no	no			yes	2005	no	65
361206	2	female	1928	2003	10	yes		no					no	no			no				no				yes	2003			no				no	no	no	no	yes	no	no	no	no	no			yes	2002	no	65
10805353	2	female	1967	2000	13	yes		no					no	no			yes	2000			yes				no				no				no	no	no	no	no	no	no	no	yes	no	18	4	no		no	65
608230	2	female	1935	1998	15	yes		no					no	no			yes	1998	2002		yes	1998	2002		no				no				no	no	no	no	yes	no	no	no	no	yes	5		yes	1998	no	76
890004	2	female	1970	1999	14	yes		no					no	no			yes	1999			yes	1999			no				no				no	no	no	no	no	no	no	no	no	no	0	0	no		no
10753244	2	female	1988	1997	16	yes		no					no	no			yes	2001			yes	2010			no				no				no	no	no	no	yes	no	no	no	yes	yes			yes	2007	no	70
12200484	2	male	1923	2006	7	yes		no					yes	no			yes	2006	2010		yes	2006	2010		yes	2006	2010		no				no	no	no	no	no	no	no	no	yes	no			yes	2006	no	68
12118830	2	female	1977	2000	13	yes	1	no					no	no			yes	2000			yes	2000			no				no				no	no	no	no	no	no	no	no	yes	yes	0	0	no		no
12549334	2	female	1954	1994	19	yes		no					no	no			no				yes	1994	1997		no				no				no	no	no	no	no	no	no	no	yes	no	24	14	no		no
925900	2	female	1933	1991	22	yes		no					no	no			yes	1991	1992		no				yes	1991	1992		no				no	no	no	yes	yes	no	no	no	no	no			no		no
940914	2	female	1932	1992	21	yes		no					no	no			no				no				no				no				no	no	no	no	yes	no	no	no	yes	no			no		no	65
11922563	2	female	1957	1992	21	yes		no					no	no			yes	1992			yes	1997			no				no				no	no	no	no	no	no	no	no	yes	no	9		yes	2004	no
796341	2	female	1926	1990	23	yes		no					no	no			yes	1991			yes	1990			yes	1990			no				no	no	no	no	yes	no	no	no	no	yes			no		no	65
881645	2	male		1991	22	yes		no					no	no			yes	1991	1994		yes	1991	1994		no				no				no	no	no	no	yes	no	no	no	no	no	21	24	yes	1991	no
11930707	2	male	1923	1990	23	yes		no					no	no			yes	1991			no				no				no				no	no	no	no	yes	no	no	no	yes	no			yes	1996	no	51
12094247	2	female	1919	1992	21	yes		no					no	no			no				yes	1999			no				no				no	no	no	no	yes	no	no	no	yes	yes			yes	2002	no
738493	2	male	1933	1989	24	yes		no					no	no			no				no				no				no				no	no	no	no	no	no	no	no	no	no			no		no
992887	2	female	1922	1994	19	yes		no					no	no			yes	1993			yes	1993			no				no				no	no	no	no	no	no	no	no	yes	no			no		no
1046118	2	female	1939	1994	19	yes		no					no	no			yes	1994			yes	1994			no				no				no	no	no	no	no	no	no	no	yes	no			no		no
617313	2	female	1920	1988	25	yes		no					no	no			no				no				no				no				no	no	no	no	yes	no	no	no	no	no			yes	1988	no	65
660017	2	female	1953	1987	26	yes		no					no	no			no				yes	1989	1990		yes	1990	1990	3	no				no	no	no	no	yes	no	no	no	yes	yes			yes	1990	no	62
557343	2	female	1927	1987	26	yes		no					no	no			yes	1992			no				yes	1994	1995		no				no	yes	no	yes	yes	no	no	no	yes	no			yes	1995	no	67
167217	2	female	1933	1993	20	yes		no					yes	no			yes	1996	1997		yes	1997			no				no				no	no	no	no	yes	no	no	no	yes	no	0	0	no		no
10256000	2	male	1933	1988	25	yes		no					no	no			yes	1988	2002		no				no				no				no	no	no	no	yes	no	no	no	yes	no			yes	2006	no
11435404	2	male	1977	1988	25	yes		no					no	no			no				no				yes	2004			no				no	no	no	no	no	no	no	no	no	yes			yes	2001	no
11524834	2	male	1920	1995	18	yes		no					no	no			yes	1995			yes	1997			no				no				no	no	no	no	yes	no	no	no	yes	no			yes	2001	no
499395	2	female	1911	1984	29	yes		no					no	no			yes	1997			no				yes	1993			no				no	no	no	no	no	no	no	no	yes	no			yes	1994	no	70
5089183	2	female	1934	1994	19	yes		no					no	no			yes	1994			yes	1994			no				no				no	no	no	no	yes	no	no	no	yes	no			yes	1997	no
12135132	2	female	1951	2000	13	yes		no					no	no			yes	2000			no				no				no				no	no	no	no	no	no	no	no	yes	no			no		no	54
807260	2	female	1949	1986	27	yes		no					no	no			yes	1986			yes	1990			no				no				no	no	no	no	yes	no	no	no	yes	no			no		no	65
11312825	2	female	1923	1983	30	yes		no					no	no			no				no				no				no				no	no	no	no	no	no	no	no	yes	no			yes	1983	no	60
11338636	2	female	1934	1984	29	yes		no					no	no			yes	1993			no				yes	1993			no				no	no	no	no	yes	no	no	no	yes	no			yes	1999	no	64
11938329	2	female	1924	1986	27	yes		no					no	no			yes	1998			yes	1998			yes	1990			no				no	no	no	no	no	no	no	no	yes	no			no		no	65
12552332	2	female	1936	1992	21	yes		no					no	no			yes	1992			no				yes	2008	2008	1	no				no	no	no	no	no	no	no	no	yes	no			no		no
480930	2	female	1913	1983	30	yes		no					no	no			no				no				no				no				no	no	no	no	no	no	no	no	yes	no			no		no
810536	2	female	1950	1982	31	yes		no					no	no			yes	1999			yes	1990			yes	1992			yes	2008			no	no	no	no	no	no	no	no	yes	yes			yes	1998	no	70
998778	2	female	1963	1993	20	yes		no					no	no			yes	1993			yes	1993			no				no				no	no	no	no	no	no	no	no	yes	no			no		no	65
462684	2	female	1941	1981	32	yes		no					no	no			yes	1985			no				no				no				no	no	no	yes	yes	no	no	no	yes	no			yes	1986	no
998002	2	female	1948	1984	29	yes		no					no	no			yes	1986			yes	1992			yes	1993			no				no	no	no	no	no	no	no	no	yes	no	14		no		no	65
415374	2	female	1924	1977	36	yes		no					no	no			no				no				no				no				no	no	no	no	no	no	no	no	yes	no			no		no	60
486096	2	female	1937	1983	30	yes		no					no	no			yes	1983	1994		yes	1983	1994		no				no				no	no	no	no	no	no	no	no	yes	yes			yes	1983	no	70
5236461	2	female	1938	1996	17	yes		no					no	no			yes	1998	2000		no				yes	1999			no				no	no	no	no	no	no	no	no	yes	yes			no		no	70
887370	2	female	1955	1985	28	yes		no					no	no			no				no				no				no				no	no	no	yes	yes	no	no	no	yes	no			no		no	61
794172	2	female	1915	1990	23	yes		no					no	no			yes	1990			yes	1990			no				no				no	no	no	no	no	no	no	no	yes	no			no		no	65
11343845	2	male	1935	1999	14	yes		no					no	no			yes	1993			yes	1995			no				no				no	no	no	no	no	no	no	no	no	no	0	0	no		no	61
709594	2	female	1930	1989	24	yes		no					no	no			yes	1988			no				no				no				no	no	no	no	no	no	no	no	yes	no			no		no	65
646910	2	female	1932	1979	34	yes		no					no	no			no				no				no				no				no	no	no	no	no	no	no	no	yes	no			yes	1988	no	60
939002	2	female	1926	1968	45	yes		no					no	no			no				no				no				no				no	no	no	no	no	no	no	no	no	no			no		no	65
1139175	2	female	1946	1995	18	yes		no					no	no			yes	1997			no				no				no				no	no	no	no	no	no	no	no	no	no	0	0	yes	1995	no
11681939	2	female	1941	1995	18	yes		no					no	no			yes	1996			yes	1995			no				no				no	no	no	no	yes	no	no	no	no	no	15	12	yes	1999	no	55
1227669	2	female	1937	1997	16	yes		no					no	no			yes	2004			yes	1998			yes	1998			no				no	no	no	no	no	no	no	no	yes	no	0	0	no		no
654661	2	female	1918	1990	23	yes		no					no	no			yes	1995			no				yes	1995			no				no	no	no	no	no	no	no	no	yes	yes			no		no
511800	2	female	1913	1985	28	yes		no					no	no			yes	1989			yes	1986			no				no				no	no	no	no	no	no	no	no	yes	no			yes	1992	no
1200711	1	female	1964	2006	7	yes	1	no					no	no			yes	2006			yes	2009			yes	2009			yes	2010			no	no	no	no	no	no	no	no	no	no	9	9	no		no
940910	1	male	1947	2005	8	yes	2	no					no				yes	2010			yes	2010			no				no				no	no	no	no	no	no	no	no	no	no	37		yes	2005	no
1289593	1	female	1955	2010	3	yes	1	no					no	no			yes	2010			yes	2010			yes	2012			yes	2012			no	no	no	no	yes	no	no	no	yes	no		17	no		no
262952	1	female	1960	2005	8	yes	1	no					no	no			yes	2006			yes	2009	2010	2	yes	2009	2012	1	yes	2006			no	no	no	no	no	no	no	no	yes	no			no		no
95761	1	female	1928	2001	12	yes	1	no					no	no			yes	2001			yes	2001			no				no				no	no	no	no	no	no	no	no	yes	yes	7	7	yes	2001	no
823659	1		1962	1994	19	yes	9	no					no	no			yes	1997			yes	1997			no				yes	2010			no	no	no	no	yes	no	no	no	no	no			no		no
98351	1	female	1960	2006	7	yes	3	no					no	no			yes	2006			yes	2006			yes	2010			yes	2011			no	no	no	no	no	no	no	no	yes	no			no		no
895176	1	female	1949	1989	24	yes	2	no					yes	no			yes	2000			yes	2001			no				yes	2010			no	no	no	no	no	no	no	no	yes	yes	11	11	no		no
150804	1	female	1938	1979	34	yes	2	no					yes				yes	1983	1998	1	yes	1983			yes	2010			yes	1989			no	no	no	yes	yes	no	no	no	yes	no	2		yes	1979	no
1398209	1	female	1945	1971	42	yes	2	no					yes	no			no								no				no				no	no	no	no	no	no	no	no	yes	yes			no		no
504896	1	female	1938	1992	21	yes		no					no	no																															no		no
912575	1	female	1963	1999	14	yes		no					no	no																															no		no
913254	1	female	1955	1995	18	yes		no					no	no																															yes		no
955945	1	female	1967	1999	14	yes		no					no	no																															no		no
963062	1	female	1961	2002	11	yes		no					no	no																															yes		no
1330677	1	female	1946	2003	10	yes		no					no	no																															no		no
1216855	2	female	1958	1996	17	yes		no					no	no			yes	1996	1996	1	no				yes	2003			no				no	no	no	no	no	no	no	no	yes	yes	15		no
484622	2	male	1940	2004	9	yes		no					no	no			yes	2004	2006		yes	2004	2006		no				no				no	no	no	no	no	no	no	no	no	no			no
35781	2	female	1930	1983	30	yes		no					no	no			no				yes	1983			no				no				no	no	no	no	yes	no	no	no	yes	no			no
679042	2	female	1923	1988	25	yes		no					no	no			no				no				no				no				no	no	no	no	yes	no	no	no	no	yes			yes	1989
700643	2	female	1930	1989	24	yes		no					no	no			yes	1989			yes	1989			no				no				no	no	no	no	no	no	no	no	yes	no			yes	2001		54
70676	1	female	1930	1982	31	yes		no					no	no																															yes
282572	1	female	1926	1979	34	yes		no					no	no																															yes
415051	1	female	1918	1992	21	yes		no					no	no																															no
1057951	1	female	1936	1999	14	yes		no					no	no																															no
1099267	1	female	1976	2001	12	yes		no					no	no																															no
1203913	1	female	1951	1975	38	yes		no					no	no																															no			30
[truncated: 67 more columns]
